# Supplementary material for: Re-sequencing and transcriptomic analysis reveals rich DNA sequence variation and differential gene expression between varieties of Ziziphus jujuba
Source: Research Square preprint supplement (doi:10.21203/rs.3.rs-253917/v1), 2021-03-02
Supplement: Supplementary file 1 [file 3a4e2a16874eeb02d3177f9b.xlsx]

## Sheet: Sheet1
Supplementary materials 3. The specific expressed genes in 'Linhuang No.1' and 'Muzao'
Tracking ID	Ref Gene	Expression
gene10906	LOC107418548	'Linhuang No.1'
gene13876	LOC107421802	'Linhuang No.1'
gene15901	LOC107423993	'Linhuang No.1'
gene22968	LOC107431666	'Linhuang No.1'
gene25015	LOC107433937	'Linhuang No.1'
gene25318	LOC107434257	'Linhuang No.1'
gene25575	LOC107434555	'Linhuang No.1'
gene25863	LOC107434849	'Linhuang No.1'
gene26064	LOC107435078	'Linhuang No.1'
gene28395	LOC107404888	'Linhuang No.1'
gene28822	LOC107405347	'Linhuang No.1'
gene29365	LOC107405940	'Linhuang No.1'
gene30522	LOC107407185	'Linhuang No.1'
gene31455	LOC107408184	'Linhuang No.1'
gene33033	LOC107409906	'Linhuang No.1'
gene4581	LOC107411660	'Linhuang No.1'
gene7773	LOC107415129	'Linhuang No.1'
gene8783	LOC107416249	'Linhuang No.1'
gene9913	LOC107417456	'Linhuang No.1'
gene9949	LOC107417495	'Linhuang No.1'
Ziziphus_jujuba_newGene_1740	--	'Linhuang No.1'
Ziziphus_jujuba_newGene_1849	--	'Linhuang No.1'
Ziziphus_jujuba_newGene_3094	--	'Linhuang No.1'
Ziziphus_jujuba_newGene_4342	--	'Linhuang No.1'
Ziziphus_jujuba_newGene_955	--	'Linhuang No.1'
gene12855	LOC107420652	'Muzao'
gene24873	LOC107433796	'Muzao'
gene28469	LOC107404962	'Muzao'
gene30930	LOC107407616	'Muzao'
gene31201	LOC107407908	'Muzao'
gene31574	LOC107408312	'Muzao'
gene32881	LOC107409736	'Muzao'
gene33009	LOC107409879	'Muzao'
gene7747	LOC107415108	'Muzao'
Ziziphus_jujuba_newGene_4384	--	'Muzao'
Ziziphus_jujuba_newGene_830	--	'Muzao'
